# Supplementary material
Source: PubMed Central journal article supplement (PMC8391772)
Supplement: jamaoncol-e213395-s002.pdf [file jamaoncol-e213395-s002.pdf]

## Supplemental Online Content

Livi L, Barletta G, Martella F, et al. Cardioprotective strategy for patients with nonmetastatic breast cancer who are receiving an anthracycline-based chemotherapy: a randomized clinical trial. *JAMA Oncol*. Published online August 26, 2021.  
doi:10.1001/jamaoncol.2021.3395

**eTable 1.** Allowed chemotherapy regimens (both in the adjuvant and neoadjuvant treatment setting).

**eTable 2.** Patient characteristics.

**eTable 3.** Echocardiography imaging measures and study drug hemodynamic effect stratified by treatment arm at each time-point (ITT analysis).

**eTable 4.** Echocardiography imaging measures and study drug hemodynamic effect comparison between baseline and end of treatment (ITT analysis).

**eTable 5.** eTable 5. Echocardiography imaging measures and study drug hemodynamic effect comparison between baseline, end of treatment, end of study observation (ITT analysis).

**eTable 6.** Study drug dose titration and tolerability.

**eMethods 1.** Main inclusion and exclusion criteria.

**eMethods 2.** Cardiac assessment.

**eMethods 3.** Statistical Methods.

This supplemental material has been provided by the authors to give readers additional information about their work.

**eTable 1. Allowed chemotherapy regimens (both in the adjuvant and neoadjuvant treatment setting).**

| <b>Regimen</b>        | <b>Drug, dose, rhythm</b>                                                                                                                                                                                                                      |
|-----------------------|------------------------------------------------------------------------------------------------------------------------------------------------------------------------------------------------------------------------------------------------|
| FEC-D 100             | Epirubicin (100 mg/m <sup>2</sup> ), cyclophosphamide (500 mg/m <sup>2</sup> ), fluorouracil (500 mg/m <sup>2</sup> ; every 21 days, for 3 cycles) followed by docetaxel (100 mg/m <sup>2</sup> , every 21 days, for 3 cycles)                 |
| FEC-D 75              | Epirubicin (75 mg/m <sup>2</sup> ), cyclophosphamide (500 mg/m <sup>2</sup> ), fluorouracil (500 mg/m <sup>2</sup> ; every 21 days, for 3 cycles) followed by docetaxel (75 mg/m <sup>2</sup> ; every 21 days, for 3 cycles)                   |
| FEC 100               | Epirubicin (100 mg/m <sup>2</sup> ), cyclophosphamide (500 mg/m <sup>2</sup> ), fluorouracil (500 mg/m <sup>2</sup> ; every 21 days, for 6 cycles)                                                                                             |
| AC                    | Doxorubicin (60 mg/m <sup>2</sup> ), cyclophosphamide (600 mg/m <sup>2</sup> ; every 21 days, for 4 cycles)                                                                                                                                    |
| EC                    | Epirubicin (75 mg/m <sup>2</sup> ), cyclophosphamide (600 mg/m <sup>2</sup> ; every 21 days, for 4 cycles)                                                                                                                                     |
| FEC/AC/EC-PAC         | FEC or AC or EC (every 21 days) followed by paclitaxel (175 mg/m <sup>2</sup> ; every 21 days, for 4 cycles; or 80 mg/m <sup>2</sup> , given weekly for 12 cycles)                                                                             |
| EC dose dense         | Epirubicin (75 mg/m <sup>2</sup> ), cyclophosphamide (600 mg/m <sup>2</sup> ) given every 15 days, for 4 cycles using primary G-CSF prophylaxis given after every cycle.                                                                       |
| HER2 positive disease | All anthracycline-containing regimens may be followed by trastuzumab (initial dose: 8 mg/kg; maintenance dose: 6 mg/kg), until completion of 1 year of adjuvant therapy; trastuzumab may be given in combination with paclitaxel or docetaxel. |

Abbreviations: HER2, human epidermal growth factor receptor 2.

**eTable 2. Patient Characteristics**

|                                       | <b>Placebo<br/>(n = 42)</b> | <b>Ramipril<br/>(n = 44)</b> | <b>Bisoprolol<br/>(n = 45)</b> | <b>Ramipril - Bisoprolol<br/>(n = 43)</b> |
|---------------------------------------|-----------------------------|------------------------------|--------------------------------|-------------------------------------------|
| <b>Age at diagnosis, years</b>        | 48.8 ± 9.9                  | 50.6 ± 8.7                   | 48.6 ± 7.9                     | 48.1 ± 8.9                                |
| <b>Stage</b>                          |                             |                              |                                |                                           |
| I                                     | 14 (33)                     | 16 (36)                      | 13 (29)                        | 10 (23)                                   |
| II                                    | 20 (48)                     | 21 (48)                      | 24 (53)                        | 25 (58)                                   |
| III                                   | 8 (19)                      | 7 (16)                       | 8 (18)                         | 8 (19)                                    |
| <b>HR positive</b>                    | 36 (86)                     | 29 (66)                      | 37 (82)                        | 30 (70)                                   |
| <b>Surgery</b>                        |                             |                              |                                |                                           |
| Breast Conserving Surgery             | 21 (50)                     | 23 (52)                      | 23 (51)                        | 19 (44)                                   |
| Mastectomy                            | 21 (50)                     | 21 (48)                      | 22 (49)                        | 24 (56)                                   |
| <b>Height, cm</b>                     | 163.7 ± 5.5                 | 163.8 ± 6.5                  | 161.9 ± 6.7                    | 165.8 ± 5.5                               |
| <b>Weight, kg</b>                     | 64.5 ± 11.1                 | 62.2 ± 11.2                  | 63.1 ± 10.9                    | 65.1 ± 11.2                               |
| <b>BSA, m<sup>2</sup></b>             | 1.70 ± .14                  | 1.67 ± .15                   | 1.67 ± .14                     | 1.72 ± .14                                |
| <b>Systolic blood pressure, mmHg</b>  | 120.8 ± 11.9                | 125.2 ± 13.7                 | 122.6 ± 11.3                   | 124.3 ± 11.3                              |
| <b>Diastolic blood pressure, mmHg</b> | 72.6 ± 8.7                  | 73.8 ± 10.3                  | 72.7 ± 8.5                     | 75.6 ± 9.0                                |
| <b>Heart rate, bpm</b>                | 72.9 ± 10.4                 | 72.6 ± 12.9                  | 71.5 ± 9.7                     | 74.5 ± 11.1                               |
| <b>Hemoglobin, g/dL</b>               | 13.0 ± 1.0                  | 13.3 ± 1.3                   | 13.1 ± 1.3                     | 13.2 ± 1.1                                |
| <b>NT proBNP, pg/mL</b>               | 78.7 ± 69.2                 | 71.6 ± 58.7                  | 71.3 ± 49.4                    | 56.7 ± 36.8                               |
| <b>Body mass index</b>                | 24.1 ± 4.3                  | 23.2 ± 4.0                   | 24.1 ± 4.2                     | 23.7 ± 4.0                                |
| <b>Current smokers</b>                | 6 (13)                      | 7 (16)                       | 1 (2)                          | 3 (7)                                     |
| <b>Ex-smokers</b>                     | 4                           | 4                            | 3                              | 6                                         |
| <b>No smokers</b>                     | 35                          | 32                           | 38                             | 35                                        |
| <b>Hypertension</b>                   | 1 (2)                       | 3 (7)                        | 0                              | 2 (5)                                     |
| <b>Troponin (&gt;95% CI)</b>          | 1 (2)                       | 0                            | 0                              | 0                                         |
| <b>Neoadjuvant chemotherapy</b>       | 11 (26)                     | 10 (23)                      | 8 (18)                         | 11 (26)                                   |
| <b>Chemotherapy regimen</b>           |                             |                              |                                |                                           |
| AC/EC-PAC                             | 39 (93)                     | 41 (93)                      | 41 (91)                        | 39 (91)                                   |
| FEC-D                                 | 0                           | 2 (5)                        | 3 (7)                          | 1 (2)                                     |
| FEC-100                               | 2 (5)                       | 0                            | 1 (2)                          | 2 (5)                                     |
| AC/EC                                 | 1 (2)                       | 1 (2)                        | 0                              | 1 (2)                                     |
| <b>Additional therapy</b>             |                             |                              |                                |                                           |
| Trastuzumab                           | 18 (43)                     | 15 (34)                      | 15 (33)                        | 16 (37)                                   |
| Radiation therapy                     | 26 (62)                     | 22 (50)                      | 27 (60)                        | 26 (60)                                   |

NOTE. Data are reported as mean ± standard deviation (SD) or n (%). No significant differences were found in any group distribution.

Abbreviations: SD, standard deviation; HR, hormonal receptors; BSA, body surface area; NT proBNP, N-Terminal Pro-Brain Natriuretic Peptide; 95% CI, 95% confidence interval; AC/EC-PAC, adriamycin or epirubicin in combination with cyclophosphamide followed by weekly paclitaxel; FEC-D, fluorouracil, epirubicin, cyclophosphamide followed by docetaxel



**eTable 3.** Echocardiography imaging measures and study drug hemodynamic effect stratified by treatment arm at each time-point (ITT analysis).

| Measure                 | Arm                   | EOT, n | Baseline     | 3-month                   | 6-month                   | 12-month                  | P°    |
|-------------------------|-----------------------|--------|--------------|---------------------------|---------------------------|---------------------------|-------|
| 3D-LVEF, %              | Placebo               | 42     | 67.3 ± 4.2   | 64.9 ± 4.7 <sup>d</sup>   | 63.5 ± 4.1 <sup>d</sup>   | 63.9 ± 3.7 <sup>d</sup>   |       |
|                         | Ramipril              | 44     | 65.7 ± 3.4   | 64.9 ± 3.0                | 64.4 ± 3.7                | 64.2 ± 3.1                |       |
|                         | Bisoprolol            | 45     | 66.5 ± 4.1   | 65.5 ± 4.2                | 65.1 ± 3.5                | 65.2 ± 4.1                |       |
|                         | Ramipril - Bisoprolol | 43     | 66.4 ± 3.1   | 65.9 ± 3.5                | 65.0 ± 3.8                | 65.6 ± 3.9                | .015  |
| GLS                     | Placebo               | 42     | -24.1 ± 1.9  | -22.9 ± 2.1 <sup>d</sup>  | -22.3 ± 2.1 <sup>d</sup>  | -22.3 ± 2.0 <sup>d</sup>  |       |
|                         | Ramipril              | 44     | -23.1 ± 1.5  | -22.7 ± 1.5               | -22.6 ± 1.7               | -22.9 ± 1.9               |       |
|                         | Bisoprolol            | 45     | -23.3 ± 2.2  | -23.0 ± 2.1               | -23.0 ± 2.2               | -23.2 ± 2.0               |       |
|                         | Ramipril - Bisoprolol | 43     | -23.0 ± 1.9  | -23.3 ± 2.1               | -22.9 ± 2.0               | -23.3 ± 1.9               | .0001 |
| EDVI, mL/m <sup>2</sup> | Placebo               | 42     | 52.4 ± 7.7   | 56.4 ± 8.9 <sup>d</sup>   | 57.7 ± 8.9 <sup>d</sup>   | 58.4 ± 9.9 <sup>d</sup>   |       |
|                         | Ramipril              | 44     | 52.3 ± 8.9   | 54.4 ± 9.1 <sup>b</sup>   | 54.7 ± 9.5                | 54.0 ± 9.9                |       |
|                         | Bisoprolol            | 45     | 53.5 ± 9.9   | 53.4 ± 9.4                | 53.2 ± 8.9                | 53.9 ± 8.9                |       |
|                         | Ramipril - Bisoprolol | 43     | 52.3 ± 6.5   | 51.9 ± 6.0                | 52.4 ± 7.2                | 52.3 ± 6.3                | .0001 |
| ESVI, mL/m <sup>2</sup> | Placebo               | 42     | 17.2 ± 3.7   | 19.8 ± 4.0 <sup>d</sup>   | 21.2 ± 4.7 <sup>d</sup>   | 21.3 ± 5.6 <sup>d</sup>   |       |
|                         | Ramipril              | 44     | 18.0 ± 3.7   | 19.1 ± 3.9 <sup>c</sup>   | 19.5 ± 4.3 <sup>c</sup>   | 19.4 ± 4.4 <sup>a</sup>   |       |
|                         | Bisoprolol            | 45     | 17.9 ± 3.9   | 18.4 ± 3.7                | 18.6 ± 3.7                | 18.8 ± 4.0                |       |
|                         | Ramipril - Bisoprolol | 43     | 17.6 ± 2.8   | 17.7 ± 2.8                | 18.3 ± 3.0 <sup>a</sup>   | 18.0 ± 2.7                | .0001 |
| E/A                     | Placebo               | 42     | 1.2 ± .3     | 1.1 ± .3                  | 1.0 ± .2 <sup>a</sup>     | 1.1 ± .3                  |       |
|                         | Ramipril              | 44     | 1.2 ± .3     | 1.2 ± .3                  | 1.1 ± .3                  | 1.2 ± .4                  |       |
|                         | Bisoprolol            | 45     | 1.2 ± .3     | 1.4 ± .4 <sup>c</sup>     | 1.2 ± .4                  | 1.3 ± .4 <sup>a</sup>     |       |
|                         | Ramipril - Bisoprolol | 43     | 1.2 ± .3     | 1.3 ± .4                  | 1.2 ± .3                  | 1.3 ± .4                  | .005  |
| E/e'                    | Placebo               | 42     | 7.5 ± 1.7    | 7.7 ± 1.7                 | 8.1 ± 1.7                 | 7.9 ± 1.9                 |       |
|                         | Ramipril              | 44     | 7.2 ± 1.3    | 7.1 ± 1.3                 | 7.6 ± 1.6                 | 7.6 ± 1.6                 |       |
|                         | Bisoprolol            | 45     | 7.6 ± 1.8    | 8.2 ± 1.8 <sup>a</sup>    | 8.2 ± 1.8                 | 8.2 ± 1.9                 |       |
|                         | Ramipril - Bisoprolol | 43     | 7.2 ± 1.5    | 7.5 ± 1.4                 | 7.6 ± 1.7                 | 7.8 ± 1.7                 | .531  |
| LAV, mL/m <sup>2</sup>  | Placebo               | 42     | 24.5 ± 5.6   | 25.0 ± 6.1                | 26.8 ± 5.9 <sup>d</sup>   | 24.4 ± 5.7                |       |
|                         | Ramipril              | 44     | 24.1 ± 4.8   | 24.9 ± 6.4                | 24.3 ± 6.0                | 22.2 ± 5.6                |       |
|                         | Bisoprolol            | 45     | 23.0 ± 5.5   | 27.5 ± 5.1 <sup>d</sup>   | 26.9 ± 5.4 <sup>d</sup>   | 24.8 ± 7.3                |       |
|                         | Ramipril - Bisoprolol | 43     | 22.7 ± 4.6   | 24.9 ± 6.2                | 24.2 ± 6.4                | 23.7 ± 5.0                | .119  |
| SAP, mmHg               | Placebo               | 42     | 122.6 ± 11.3 | 117.5 ± 15.4              | 122.5 ± 11.2              | 121.7 ± 14.9              |       |
|                         | Ramipril              | 44     | 124.3 ± 11.3 | 117.3 ± 10.6 <sup>d</sup> | 117.5 ± 10.5 <sup>d</sup> | 119.4 ± 12.7 <sup>a</sup> |       |
|                         | Bisoprolol            | 45     | 120.8 ± 11.9 | 113.6 ± 14.5              | 116.6 ± 14.3              | 118.2 ± 15.4              |       |
|                         | Ramipril - Bisoprolol | 43     | 125.2 ± 13.7 | 113.7 ± 13.2 <sup>d</sup> | 112.2 ± 14.8 <sup>d</sup> | 116.3 ± 13.7 <sup>d</sup> | .001  |

|                  |                       |    |             |                          |                          |                          |       |
|------------------|-----------------------|----|-------------|--------------------------|--------------------------|--------------------------|-------|
| <b>DAP, mmHg</b> | Placebo               | 42 | 72.7 ± 8.5  | 71.0 ± 11.0              | 74.5 ± 10.1              | 73.2 ± 10.3              |       |
|                  | Ramipril              | 44 | 75.6 ± 9.0  | 71.3 ± 8.7 <sup>c</sup>  | 72.9 ± 8.8               | 75.9 ± 13.6              |       |
|                  | Bisoprolol            | 45 | 72.6 ± 8.7  | 69.1 ± 8.9 <sup>a</sup>  | 70.5 ± 8.8               | 70.1 ± 10.2              |       |
|                  | Ramipril - Bisoprolol | 43 | 73.8 ± 10.3 | 67.0 ± 10.2 <sup>d</sup> | 68.7 ± 9.5 <sup>d</sup>  | 70.4 ± 9.4               | .021  |
| <b>HR, bpm</b>   | Placebo               | 42 | 71.5 ± 9.7  | 79.2 ± 11.1 <sup>d</sup> | 80.8 ± 13.3 <sup>d</sup> | 71.4 ± 12.0              |       |
|                  | Ramipril              | 44 | 74.5 ± 11.1 | 80.1 ± 12.9 <sup>d</sup> | 79.6 ± 12.5 <sup>a</sup> | 70.9 ± 10.8              |       |
|                  | Bisoprolol            | 45 | 72.9 ± 10.4 | 65.0 ± 9.4 <sup>d</sup>  | 66.0 ± 8.2 <sup>d</sup>  | 60.6 ± 7.5 <sup>d</sup>  |       |
|                  | Ramipril - Bisoprolol | 43 | 72.6 ± 12.9 | 66.8 ± 12.3 <sup>a</sup> | 68.7 ± 12.2              | 64.7 ± 12.8 <sup>c</sup> | .0001 |

NOTE. Data are reported as means ± standard deviation (SD).

Abbreviations: EOT, end of allocated treatment; 3D-LVEF, 3-dimensional left ventricular ejection fraction; GLS, global longitudinal strain; EDVI, indexed left ventricular end diastolic volume; ESVI, indexed left ventricular end systolic volume; E/A, early to late diastolic transmitral flow velocity ratio; E/e', early diastolic transmitral flow velocity to early diastolic mitral annular tissue velocity ratio; LAV, left atrial volume; SAP, systolic arterial pressure; DAP, diastolic arterial pressure; HR, heart rate.

<sup>°</sup> General linear modeling repeated measures, Helmet contrast, *P* value form by Greenhouse-Geisser correction.

<sup>a</sup> *P* < .05 compared with baseline.

<sup>b</sup> *P* < .01 compared with baseline.

<sup>c</sup> *P* < .005 compared with baseline.

<sup>d</sup> *P* < .001 compared with baseline.

**eTable 4. Echocardiography imaging measures and study drug hemodynamic effect comparison between baseline and end of treatment (ITT analysis).**

|                | n   | Baseline mean (95%CI) unadjusted | EOT mean (95% CI) unadjusted | EOT mean (95% CI) adjusted | % changes from baseline to EOT | <i>p</i> <sup>a</sup> | <i>p</i> <sup>b</sup> |
|----------------|-----|----------------------------------|------------------------------|----------------------------|--------------------------------|-----------------------|-----------------------|
| <b>3D-LVEF</b> |     |                                  |                              |                            |                                |                       |                       |
| No ramipril    | 87  | 66.8 (66.0, 67.7)                | 64.6 (63.7, 65.4)            | 64.4 (63.7, 65.1)          | -3.1                           | .213                  | .071                  |
| Ramipril       | 87  | 66.1 (65.4, 66.8)                | 64.9 (64.1, 65.6)            | 65.0 (64.3, 65.8)          | -2.1                           |                       |                       |
| No bisoprolol  | 86  | 66.5 (65.6, 67.3)                | 64.0 (63.3, 64.8)            | 64.0 (63.3, 64.8)          | -3.6                           | .008 <sup>c</sup>     | .024 <sup>c</sup>     |
| Bisoprolol     | 88  | 66.5 (65.7, 67.2)                | 65.4 (64.6, 66.2)            | 65.4 (64.7, 66.1)          | -1.6                           |                       |                       |
| All            | 174 | 66.5 (65.9, 67.0)                |                              |                            |                                |                       |                       |
| <b>GLS</b>     |     |                                  |                              |                            |                                |                       |                       |
| No ramipril    | 87  | -23.7 (-24.1, -23.2)             | -22.8 (-23.2, -22.3)         | -22.6 (-23.0, -22.2)       | -3.2                           | .045 <sup>c</sup>     | .004 <sup>c</sup>     |
| Ramipril       | 87  | -23.1 (-23.4, -22.7)             | -23.1 (-23.5, -22.7)         | -23.2 (-23.6, -22.8)       | -0.7                           |                       |                       |
| No bisoprolol  | 86  | -23.6 (-23.9, -23.2)             | -22.6 (-23.0, -22.2)         | -22.6 (-22.9, -22.2)       | -3.5                           | .006 <sup>c</sup>     | .002 <sup>c</sup>     |
| Bisoprolol     | 88  | -23.2 (-23.6, -22.7)             | -23.3 (-23.7, -22.8)         | -23.3 (-23.7, -22.9)       | -0.1                           |                       |                       |
| All            | 174 | -23.4 (-23.6, -23.1)             |                              |                            |                                |                       |                       |
| <b>EDVI</b>    |     |                                  |                              |                            |                                |                       |                       |
| No ramipril    | 87  | 53.0 (51.1, 54.9)                | 56.1 (54.0, 58.1)            | 55.7 (54.6, 56.8)          | 5.9                            | .006 <sup>c</sup>     | .008 <sup>c</sup>     |
| Ramipril       | 87  | 52.3 (50.6, 54.0)                | 53.2 (51.4, 55.0)            | 53.5 (52.4, 54.6)          | 1.7                            |                       |                       |
| No bisoprolol  | 86  | 52.4 (50.6, 54.2)                | 56.2 (54.0, 58.3)            | 56.4 (55.4, 57.5)          | 7.2                            | <.0001 <sup>c</sup>   | <.0001 <sup>c</sup>   |
| Bisoprolol     | 88  | 52.9 (51.1, 54.7)                | 53.1 (51.5, 54.8)            | 52.9 (51.9, 54.0)          | 0.5                            |                       |                       |
| All            | 174 | 52.7 (51.4, 53.9)                |                              |                            |                                |                       |                       |
| <b>ESVI</b>    |     |                                  |                              |                            |                                |                       |                       |
| No ramipril    | 87  | 17.6 (16.8, 18.4)                | 20.0 (18.9, 21.0)            | 20.0 (19.4, 20.7)          | 13.5                           | .004 <sup>c</sup>     | .004 <sup>c</sup>     |
| Ramipril       | 87  | 17.8 (17.1, 18.5)                | 18.7 (17.9, 19.5)            | 18.6 (17.9, 19.3)          | 5.4                            |                       |                       |
| No bisoprolol  | 86  | 17.6 (16.8, 18.4)                | 20.3 (19.2, 21.4)            | 20.4 (19.7, 21.0)          | 15.3                           | <.0001 <sup>c</sup>   | <.0001 <sup>c</sup>   |
| Bisoprolol     | 88  | 17.7 (17.0, 18.5)                | 18.4 (17.7, 19.1)            | 18.3 (17.7, 19.0)          | 3.7                            |                       |                       |
| All            | 174 | 17.7 (17.1, 18.2)                |                              |                            |                                |                       |                       |
| <b>E/A</b>     |     |                                  |                              |                            |                                |                       |                       |
| No ramipril    | 87  | 1.2 (1.1, 1.2)                   | 1.2 (1.1, 1.3)               | 1.2 (1.1, 1.3)             | 3.6                            | .421                  | .442                  |
| Ramipril       | 87  | 1.2 (1.1, 1.2)                   | 1.3 (1.2, 1.3)               | 1.3 (1.2, 1.3)             | 7.2                            |                       |                       |
| No bisoprolol  | 86  | 1.2 (1.1, 1.2)                   | 1.1 (1.1, 1.2)               | 1.1 (1.1, 1.2)             | -3.2                           | <.0001 <sup>c</sup>   | <.0001 <sup>c</sup>   |
| Bisoprolol     | 88  | 1.2 (1.1, 1.2)                   | 1.3 (1.2, 1.4)               | 1.3 (1.3, 1.4)             | 13.7                           |                       |                       |
| All            | 174 | 1.2 (1.1, 1.2)                   |                              |                            |                                |                       |                       |
| <b>E/e'</b>    |     |                                  |                              |                            |                                |                       |                       |
| No ramipril    | 87  | 7.5 (7.1, 7.9)                   | 8.1 (7.7, 8.5)               | 8.0 (7.6, 8.3)             | 8.3                            | .492                  | .987                  |
| Ramipril       | 87  | 7.2 (6.9, 7.5)                   | 7.7 (7.4, 8.1)               | 7.8 (7.5, 8.1)             | 6.2                            |                       |                       |
| No bisoprolol  | 86  | 7.3 (7.0, 7.6)                   | 7.8 (7.4, 8.1)               | 7.8 (7.5, 8.1)             | 6.1                            | .377                  | .459                  |

|               |     |                      |                      |                      |       |                      |                     |
|---------------|-----|----------------------|----------------------|----------------------|-------|----------------------|---------------------|
| Bisoprolol    | 88  | 7.4 (7.0, 7.7)       | 8.0 (7.6, 8.4)       | 8.0 (7.7, 8.3)       | 8.8   |                      |                     |
| All           | 174 | 7.3 (7.1, 7.6)       |                      |                      |       |                      |                     |
| <b>LAV</b>    |     |                      |                      |                      |       |                      |                     |
| No ramipril   | 87  | 23.7 (22.5, 24.9)    | 24.6 (23.2, 26.0)    | 24.5 (23.3, 25.8)    | 4.2   | .083                 | .208                |
| Ramipril      | 87  | 23.4 (22.4, 24.4)    | 23.0 (21.8, 24.1)    | 23.0 (21.8, 24.2)    | -2.4  |                      |                     |
| No bisoprolol | 86  | 24.3 (23.1, 25.4)    | 23.3 (22.0, 24.5)    | 23.2 (21.9, 24.4)    | -1.6  | .12                  | .025 <sup>c</sup>   |
| Bisoprolol    | 88  | 22.9 (21.8, 24.0)    | 24.2 (22.9, 25.6)    | 24.6 (23.3, 25.8)    | 4.3   |                      |                     |
| All           | 174 | 23.6 (22.8, 24.3)    |                      |                      |       |                      |                     |
| <b>SAP</b>    |     |                      |                      |                      |       |                      |                     |
| No ramipril   | 87  | 121.6 (119.2, 124.1) | 119.9 (116.7, 123.2) | 121.3 (118.9, 123.7) | -1.6  | .012 <sup>c</sup>    | .004 <sup>c</sup>   |
| Ramipril      | 87  | 124.8 (122.1, 127.4) | 117.9 (115.1, 120.7) | 116.9 (114.5, 119.3) | -5.1  |                      |                     |
| No bisoprolol | 86  | 123.5 (121.1, 125.9) | 120.5 (117.6, 123.5) | 120.3 (117.9, 122.7) | -2.4  | .103                 | .142                |
| Bisoprolol    | 88  | 122.9 (120.2, 125.7) | 117.3 (114.2, 120.4) | 117.5 (115.1, 119.9) | -4.6  |                      |                     |
| All           | 174 | 123.2 (121.4, 125.0) |                      |                      |       |                      |                     |
| <b>DAP</b>    |     |                      |                      |                      |       |                      |                     |
| No ramipril   | 87  | 72.6 (70.8, 74.4)    | 71.6 (69.4, 73.8)    | 72.4 (70.5, 74.4)    | -1.7  | .889                 | .771                |
| Ramipril      | 87  | 74.7 (72.6, 76.7)    | 73.2 (70.7, 75.8)    | 72.6 (70.7, 74.6)    | -1.4  |                      |                     |
| No bisoprolol | 86  | 74.2 (72.3, 76.0)    | 74.6 (72.0, 77.2)    | 74.2 (72.3, 76.1)    | 0.7   | .009 <sup>a</sup>    | .021 <sup>c</sup>   |
| Bisoprolol    | 88  | 73.2 (71.2, 75.2)    | 70.3 (68.2, 72.3)    | 70.5 (68.6, 72.5)    | -4.2  |                      |                     |
| All           | 174 | 73.7 (72.3, 75.0)    |                      |                      |       |                      |                     |
| <b>HR</b>     |     |                      |                      |                      |       |                      |                     |
| No ramipril   | 87  | 72.2 (70.1, 74.4)    | 65.9 (63.5, 68.3)    | 66.1 (63.8, 68.4)    | -9.3  | 0.387                | .682                |
| Ramipril      | 87  | 73.5 (71.0, 76.1)    | 67.8 (65.2, 70.4)    | 67.5 (65.3, 69.7)    | -7.4  |                      |                     |
| No bisoprolol | 86  | 73.0 (70.8, 75.3)    | 71.2 (68.7, 73.6)    | 71.1 (69.0, 73.2)    | -2.4  | <0.0001 <sup>c</sup> | <.0001 <sup>c</sup> |
| Bisoprolol    | 88  | 72.7 (70.3, 75.2)    | 62.6 (60.4, 64.9)    | 62.7 (60.6, 64.7)    | -14.0 |                      |                     |
| All           | 174 | 72.9 (71.2, 74.5)    |                      |                      |       |                      |                     |

NOTE. Data are reported as means (95% CI).

Abbreviations: EOT, end of allocated treatment; 3D-LVEF, 3-dimensional left ventricular ejection fraction; GLS, global longitudinal strain; EDVI, indexed left ventricular end diastolic volume; ESVI, indexed left ventricular end systolic volume; E/A, early to late diastolic transmitral flow velocity ratio; E/e', early diastolic transmitral flow velocity to early diastolic mitral annular tissue velocity ratio; LAV, left atrial volume; SAP, systolic arterial pressure; DAP, diastolic arterial pressure; HR, heart rate.

<sup>a</sup> Statistical analysis was performed by ANCOVA, covariates were compared by least significant difference vs. no drug (ramipril or bisoprolol).

<sup>b</sup> Statistical analysis was performed by general linear modeling repeated measures, Helmert contrast, p value form by Greenhouse-Geisser correction.

<sup>c</sup>  $P < .05$ .



**eTable 5. Echocardiography imaging measures and study drug hemodynamic effect comparison between baseline, end of treatment, end of study observation (ITT analysis).**

|                               | n   | T0 mean (95% CI) baseline unadjusted | EOT mean (95% CI) 12-month adjusted | % changes from baseline to EOT | <i>P</i> <sup>a</sup> | <i>P</i> <sup>b</sup> | EOS mean (95% CI) 24-month adjusted | % changes from EOT to EOS | % changes from T0 to EOS | <i>P</i> <sup>a</sup> | <i>P</i> <sup>b</sup> |
|-------------------------------|-----|--------------------------------------|-------------------------------------|--------------------------------|-----------------------|-----------------------|-------------------------------------|---------------------------|--------------------------|-----------------------|-----------------------|
| <b>LVEF 3D, %</b>             |     |                                      |                                     |                                |                       |                       |                                     |                           |                          |                       |                       |
| No ramipril                   | 64  | 67.3 (66.3, 68.4)                    | 65.1 (64.2, 65.9)                   | -3.0                           | .834                  | .470                  | 64.5 (63.8, 65.3)                   | 0.8                       | -3.8                     | .617                  | .343                  |
| Ramipril                      | 61  | 66.7 (66.0, 67.5)                    | 65.2 (64.3, 66.1)                   | -2.8                           |                       |                       | 64.8 (64.0, 65.6)                   | 0.6                       | -3.4                     |                       |                       |
| No bisoprolol                 | 62  | 67.1 (66.0, 68.1)                    | 64.1 (63.3, 65.0)                   | -4.3                           | .001 <sup>c</sup>     | .006 <sup>c</sup>     | 64.2 (63.4, 64.9)                   | -0.1                      | -4.3                     | .062                  | .117                  |
| Bisoprolol                    | 63  | 67.0 (66.2, 67.9)                    | 66.1 (65.3, 67.0)                   | -1.4                           |                       |                       | 65.2 (64.4, 65.9)                   | 1.5                       | -2.8                     |                       |                       |
| All                           | 125 | 67.1 (66.4, 67.7)                    |                                     |                                |                       |                       |                                     |                           |                          |                       |                       |
| <b>GLS</b>                    |     |                                      |                                     |                                |                       |                       |                                     |                           |                          |                       |                       |
| No ramipril                   | 64  | -24.1 (-24.6, -23.6)                 | -22.6 (-23.1, -22.1)                | -4.5                           | .111                  | .008 <sup>c</sup>     | -22.8 (-23.3, -22.4)                | -0.9                      | -3.7                     | .051                  | .004 <sup>c</sup>     |
| Ramipril                      | 61  | -23.3 (-23.7, -22.9)                 | -23.2 (-23.7, -22.7)                | -2.1                           |                       |                       | -23.4 (-23.9, -23.0)                | -1.0                      | -1.1                     |                       |                       |
| No bisoprolol                 | 62  | -23.8 (-24.3, -23.4)                 | -22.4 (-22.9, -22.0)                | -5.3                           | .003 <sup>c</sup>     | .004 <sup>c</sup>     | -22.9 (-23.3, -22.5)                | -2.0                      | -3.4                     | .067                  | .051                  |
| Bisoprolol                    | 63  | -23.6 (-24.1, -23.1)                 | -23.5 (-24.0, -23.0)                | -0.8                           |                       |                       | -23.5 (-23.9, -23.0)                | 0.2                       | -1.0                     |                       |                       |
| All                           | 125 | -23.7 (-24.0, -23.4)                 |                                     |                                |                       |                       |                                     |                           |                          |                       |                       |
| <b>EDVI, mL/m<sup>2</sup></b> |     |                                      |                                     |                                |                       |                       |                                     |                           |                          |                       |                       |
| No ramipril                   | 64  | 54.5 (52.3, 56.6)                    | 55.5 (54.2, 56.9)                   | 4.7                            | .022 <sup>c</sup>     | .031 <sup>c</sup>     | 55.3 (53.8, 56.8)                   | 0.5                       | 4.3                      | .019                  | .034 <sup>c</sup>     |
| Ramipril                      | 61  | 51.5 (49.7, 53.3)                    | 53.2 (51.8, 54.6)                   | 0.4                            |                       |                       | 52.7 (51.2, 54.2)                   | 1.0                       | -0.6                     |                       |                       |
| No bisoprolol                 | 62  | 52.5 (50.6, 54.5)                    | 57.1 (55.9, 58.3)                   | 7.7                            | .0001 <sup>c</sup>    | .0001 <sup>c</sup>    | 56.3 (54.9, 57.7)                   | 1.4                       | 6.2                      | .0001 <sup>c</sup>    | .0001 <sup>c</sup>    |
| Bisoprolol                    | 63  | 53.5 (51.4, 55.6)                    | 51.9 (50.7, 53.1)                   | -2.1                           |                       |                       | 52.1 (50.7, 53.5)                   | -0.4                      | -1.7                     |                       |                       |
| All                           | 125 | 53.0 (51.6, 54.4)                    |                                     |                                |                       |                       |                                     |                           |                          |                       |                       |
| <b>ESVI, mL/m<sup>2</sup></b> |     |                                      |                                     |                                |                       |                       |                                     |                           |                          |                       |                       |
| No ramipril                   | 64  | 17.8 (16.8, 18.7)                    | 19.7 (18.8, 20.6)                   | 12.6                           | .039 <sup>a</sup>     | .052                  | 19.8 (19.0, 20.7)                   | -0.8                      | 13.5                     | .016 <sup>c</sup>     | .029 <sup>c</sup>     |
| Ramipril                      | 61  | 17.2 (16.4, 17.9)                    | 18.4 (17.5, 19.3)                   | 5.1                            |                       |                       | 18.4 (17.5, 19.2)                   | -0.1                      | 5.2                      |                       |                       |
| No bisoprolol                 | 62  | 17.3 (16.4, 18.2)                    | 20.6 (19.8, 21.4)                   | 17.7                           | .0001 <sup>c</sup>    | .0001 <sup>c</sup>    | 20.2 (19.4, 21.0)                   | 1.6                       | 15.8                     | .0001 <sup>c</sup>    | .0001 <sup>c</sup>    |
| Bisoprolol                    | 63  | 17.6 (16.8, 18.4)                    | 17.6 (16.8, 18.4)                   | 0.8                            |                       |                       | 18.1 (17.3, 18.9)                   | -3.0                      | 3.8                      |                       |                       |
| All                           | 125 | 17.5 (16.9, 18.1)                    |                                     |                                |                       |                       |                                     |                           |                          |                       |                       |
| <b>E/A</b>                    |     |                                      |                                     |                                |                       |                       |                                     |                           |                          |                       |                       |
| No ramipril                   | 64  | 1.2 (1.1, -1.3)                      | 1.2 (1.1, 1.3)                      | 2.9                            | .466                  | .483                  | 1.1 (1.1, 1.2)                      | 6.4                       | -3.7                     | .661                  | .655                  |
| Ramipril                      | 61  | 1.2 (1.1, -1.3)                      | 1.3 (1.2, 1.4)                      | 6.8                            |                       |                       | 1.1 (1.0, 1.2)                      | 11.8                      | -5.8                     |                       |                       |
| No bisoprolol                 | 62  | 1.2 (1.1, -1.3)                      | 1.1 (1.0, 1.2)                      | -4.2                           | .001 <sup>c</sup>     | .001 <sup>c</sup>     | 1.1 (1.1, 1.2)                      | 0.0                       | -4.2                     | .055                  | .832                  |
| Bisoprolol                    | 63  | 1.2 (1.1, -1.3)                      | 1.3 (1.3, 1.4)                      | 13.7                           |                       |                       | 1.1 (1.0, 1.2)                      | 16.6                      | -5.2                     |                       |                       |
| All                           | 125 | 1.2 (1.1, 1.2)                       |                                     |                                |                       |                       |                                     |                           |                          |                       |                       |
| <b>E/e'</b>                   |     |                                      |                                     |                                |                       |                       |                                     |                           |                          |                       |                       |
| No ramipril                   | 64  | 7.4 (6.9, 7.9)                       | 7.9 (7.5, 8.3)                      | 7.8                            | .378                  | .656                  | 7.7 (7.3, 8.0)                      | 2.9                       | 4.6                      | .694                  | .514                  |

|                   |     |                   |                   |       |                    |                    |                   |      |       |      |      |
|-------------------|-----|-------------------|-------------------|-------|--------------------|--------------------|-------------------|------|-------|------|------|
| Ramipril          | 61  | 7.2 (6.9, 7.6)    | 7.7 (7.3, 8.0)    | 4.6   |                    |                    | 7.8 (7.4, 8.2)    | -1.5 | 6.1   |      |      |
| No bisoprolol     | 62  | 7.3 (6.9, 7.6)    | 7.7 (7.3, 8.1)    | 5.2   | .523               | .686               | 7.8 (7.4, 8.2)    | -1.2 | 6.4   | .621 | .542 |
| Bisoprolol        | 63  | 7.4 (6.9, 7.8)    | 7.9 (7.5, 8.2)    | 7.5   |                    |                    | 7.6 (7.3, 8.0)    | 2.8  | 4.5   |      |      |
| All               | 125 | 7.3 (7.0, 7.6)    |                   |       |                    |                    |                   |      |       |      |      |
| <b>LAV, mL/m2</b> |     |                   |                   |       |                    |                    |                   |      |       |      |      |
| No ramipril       | 64  | 24.2 (22.7, 25.6) | 25.9 (24.5, 27.4) | 10.0  | .061               | .425               | 19.4 (18.0, 20.7) | 25.4 | -17.9 | .518 | .184 |
| Ramipril          | 61  | 22.9 (21.8, 24.1) | 24.0 (22.5, 25.4) | 1.6   |                    |                    | 20.0 (18.6, 21.3) | 16.6 | -15.3 |      |      |
| No bisoprolol     | 62  | 24.2 (22.8, 25.5) | 24.4 (22.9, 25.8) | 3.4   | .208               | .083               | 19.5 (18.2, 20.8) | 20.0 | -17.3 | .425 | .176 |
| Bisoprolol        | 63  | 23.0 (21.7, 24.3) | 25.7 (24.2, 27.1) | 9.0   |                    |                    | 20.2 (18.9, 21.6) | 21.2 | -14.1 |      |      |
| All               | 125 | 23.6 (22.6, 24.5) |                   |       |                    |                    |                   |      |       |      |      |
| <b>SAP, mmHg</b>  |     |                   |                   |       |                    |                    |                   |      |       |      |      |
| No ramipril       | 64  | 122 (119, 125)    | 121 (119, 124)    | -1.5  | .031 <sup>c</sup>  | .021 <sup>c</sup>  | 122 (120,125)     | -0.6 | -0.9  | .156 | .087 |
| Ramipril          | 61  | 124 (121, 127)    | 117 (114,120)     | -5.1  |                    |                    | 120 (117,122)     | -2.2 | -3.0  |      |      |
| No bisoprolol     | 62  | 123 (120, 126)    | 121 (118,123)     | -2.1  | .115               | .120               | 120 (118,123)     | 0.3  | -2.4  | .666 | .687 |
| Bisoprolol        | 63  | 123 (120, 126)    | 117 (114,120)     | -4.8  |                    |                    | 121 (119,124)     | -3.2 | -1.7  |      |      |
| All               | 125 | 123 (121, 125)    |                   |       |                    |                    |                   |      |       |      |      |
| <b>DAP, mmHg</b>  |     |                   |                   |       |                    |                    |                   |      |       |      |      |
| No ramipril       | 64  | 71.6 (69.5, 73.7) | 71.3 (68.8, 73.7) | -1.8  | .624               | .849               | 75.0 (72.7, 77.3) | -5.2 | 3.3   | .934 | .734 |
| Ramipril          | 61  | 73.6 (71.3, 75.9) | 72.1 (69.6, 74.6) | -0.6  |                    |                    | 75.2 (72.8, 77.5) | -4.2 | 3.5   |      |      |
| No bisoprolol     | 62  | 73.0 (70.9, 75.1) | 74.2 (71.9, 76.6) | 2.2   | .002 <sup>c</sup>  | .005 <sup>c</sup>  | 75.1 (72.8, 77.5) | -1.2 | 3.5   | .834 | .979 |
| Bisoprolol        | 63  | 72.2 (69.9, 74.5) | 69.0 (66.6, 71.4) | -5.0  |                    |                    | 74.8 (72.5, 77.1) | -8.4 | 3.0   |      |      |
| All               | 125 | 72.6 (71.1, 74.1) |                   |       |                    |                    |                   |      |       |      |      |
| <b>HR, bpm</b>    |     |                   |                   |       |                    |                    |                   |      |       |      |      |
| No ramipril       | 64  | 73.4 (70.7, 76.1) | 67.1 (64.3, 69.8) | -9.2  | 0.639              | .889               | 68.4 (65.9, 70.8) | -1.9 | -7.5  | .158 | .321 |
| Ramipril          | 61  | 74.4 (71.5, 77.3) | 68.0 (65.2, 70.8) | -7.9  |                    |                    | 70.9 (68.4, 73.3) | -4.2 | -4.1  |      |      |
| No bisoprolol     | 62  | 73.7 (71.0, 76.4) | 72.5 (70.0, 75.0) | -1.9  | .0001 <sup>c</sup> | .0001 <sup>c</sup> | 70.7 (68.2, 73.3) | 2.4  | -4.2  | .223 | .242 |
| Bisoprolol        | 63  | 74.1 (71.2, 77.0) | 62.8 (60.3, 65.2) | -15.0 |                    |                    | 68.6 (66.1, 71.0) | -9.2 | -7.2  |      |      |
| All               | 125 | 73.9 (71.9, 75.8) |                   |       |                    |                    |                   |      |       |      |      |

NOTE. Data are reported as means (95% CI).

Abbreviations: EOT, end of allocated treatment; EOS, end of study observation; 3D-LVEF, 3-dimensional left ventricular ejection fraction; GLS, global longitudinal strain; EDVI, indexed left ventricular end diastolic volume; ESVI, indexed left ventricular end systolic volume; E/A, early to late diastolic transmitral flow velocity ratio; E/e', early diastolic transmitral flow velocity to early diastolic mitral annular tissue velocity ratio; LAV, left atrial volume; SAP, systolic arterial pressure; DAP, diastolic arterial pressure; HR, heart rate.

<sup>a</sup> Statistical analysis was performed by ANCOVA, covariates were compared by least significant difference vs. no drug (ramipril or bisoprolol).

<sup>b</sup> Statistical analysis was performed by general linear modeling repeated measures, Helmet contrast, p value form by Greenhouse-Geisser correction

<sup>c</sup>  $P < .05$ .



**eTable 6. Study drug dose titration and tolerability.**

|                                                    | <b>Placebo<br/>(n = 42)</b> | <b>Ramipril<br/>(n = 44)</b> | <b>Bisoprolol<br/>(n = 45)</b> | <b>Ramipril - Bisoprolol<br/>(n = 43)</b> |
|----------------------------------------------------|-----------------------------|------------------------------|--------------------------------|-------------------------------------------|
| <b>Dose titration, n (%)</b>                       |                             |                              |                                |                                           |
| 100% dose <sup>a</sup>                             | 38 (90.4)                   | 43 (97.7)                    | 43 (95.4)                      | 34 (79.1) <sup>b</sup>                    |
| 50% dose                                           | 3 (7.2)                     | 0                            | 1 (2.3)                        | 7 (16.3)                                  |
| 25% dose                                           | 0                           | 0                            | 0                              | 1 (2.3)                                   |
| Discontinuation                                    | 1 (2.4)                     | 1 (2.3)                      | 1 (2.3)                        | 1 (2.3)                                   |
| <b>Dose reduction/discontinuation cause, n (%)</b> |                             |                              |                                |                                           |
| Hypotension                                        | 3 (7.2)                     | 0                            | 1 (2.3)                        | 6 (14) <sup>b</sup>                       |
| Cough                                              | 0                           | 1 (2.3)                      | 0                              | 2 (4.7) <sup>b</sup>                      |
| Bradycardia                                        | 0                           | 0                            | 1 (2.3)                        | 1 (2.3)                                   |
| Heart Failure                                      | 1 (2.4)                     | 0                            | 0                              | 0                                         |

<sup>a</sup> 100% dose = bisoprolol and/or ramipril 5 mg daily.

<sup>b</sup>  $P < 0.05$  compared with other groups.

## **eMethods 1. Main inclusion and exclusion criteria.**

Trial inclusion criteria were the following: non-metastatic, histology-proven, BC; indication to primary or postoperative systemic therapy using an anthracycline-based regimen with or without trastuzumab; written informed consent; age  $\geq 18$  years.

Exclusion criteria were previous treatment with anthracyclines; ongoing treatment with ACEi/Angiotensin-II Receptor Blockers or BB; baseline LVEF  $< 50\%$ ; previous diagnosis of solid tumors treated with systemic therapy; recurrent and/or metastatic BC; impossibility of LV function evaluation at echocardiography; heart failure symptoms; prior diagnosis of cardiomyopathy, coronary artery disease, moderate to severe mitral and aortic disease; pharmacological therapy for asthma.

## eMethods 2. Cardiac assessment.

Medical history, electrocardiogram (EKG), clinical examination with specific attention to signs of heart failure, NYHA class and Canadian angina grading scale score were recorded during each visit. Transthoracic echocardiography was performed with a commercially available system (EPIQ, X5-1 transducer, Philips Healthcare, Andover, Massachusetts). All measurements were performed and reported accordingly to the American Society of Echocardiography (ASE) and the European Association of Cardiovascular Imaging (EACVI) recommendations<sup>1</sup>. Each measure was averaged over three cardiac cycles. Two-dimensional LVEF (2D-LVEF) was measured by Simpson rule, throughout apical 4- and 2-chamber views. LV mass was calculated from LV oriented M-mode tracings using the Devereux formula<sup>2</sup>, ASE convention<sup>1</sup>, and was indexed to body surface area (BSA)<sup>3</sup>. Diastolic function was evaluated by left atrial volume index, systolic pulmonary pressure, mitral inflow E/A pattern, E/A ratio, E velocity deceleration time, annular tissue Doppler e', and E/e' ratio<sup>4</sup>. After optimizing image quality, maximizing frame rate, and minimizing foreshortening, which are all critical to reduce measurement variability, GLS measurements were made in the three standard apical views and averaged. LV 4-, 3-, and 2-chamber views were acquired during breath hold. From apical long-axis view to visualize aortic valve closure, using opening and closing clicks of the aortic valve the timing of aortic valve opening and closing on continuous wave (CW) Doppler imaging respect to EKG R wave was measured. Full-volume six-cycles gated acquisition breath hold images of left ventricle were acquired for Q-lab analysis to obtain end-diastolic volume, end systolic volume, indexed to BSA (EDVI and ESVI) and 3D-LVEF<sup>5</sup>. Q-lab version in this study was 10.5. All echocardiography data was stored including the original Digital Imaging and Communications in Medicine (DICOM) images. All scans were read jointly by two experienced board certified echocardiographers who were blinded to all clinical characteristics. Systemic arterial pressure was measured simultaneously with echo measurements, by means of an arm-cuff sphygmomanometer. EKG was performed using ELI 200 Mortara electrocardiograph. The heart rate and QTc measurement according to Fridericia correction were recorded.

### eMethods 3. Statistical Methods.

The primary endpoint was defined as detection of any subclinical impairment in myocardial function and deformation (worsening  $\geq 10\%$ ) measured with standard and 3-dimensional (3D) echocardiography and left ventricular (LV) global longitudinal strain (GLS). This is a pre-specified interim analysis on the first 174 patients who had completed cardiologic assessment at 12-month (T3) and reached the EOT.

An independent data and safety monitoring committee was established to advise the investigators at regular intervals and potential need for premature study termination due to safety, efficacy or slower than anticipated recruitment. Although the interim analysis results were significantly in favor of a cardioprotective strategy, due to the slow rate of enrollment, worsened by the outbreak of COVID-19 that has severely affected the ability to safely conduct clinical trials, the study promoter decided to prematurely terminate recruitment in June 2020<sup>6-8</sup>. An updated final analysis is already pre-planned when all the 262 enrolled patients will reach the EOS (June 2022).

Patients were allocated in a 2x2 factorial design to one of the four treatment arms (**Figure 1**). Allocation of the participants in the trial arms was conducted by a stratified randomization, using permuted blocks within defined age and HER2 status strata, software based. The reported rate of subclinical cardiotoxicity measured with traditional methods and tissue Doppler imaging varies in a range of 20–75%<sup>9-13</sup>. Considering a median rate of subclinical alteration of 40%, with 15% reduction in treatment groups to reach the outcome, the study design required a sample of 90 patients per treatment group provided an 80% statistical power. The interim analysis was based to test an anticipated 10% change in 3D-LVEF, two-tailed significance level of  $\alpha = .05$ , 80% power, 43 patients per group required. This analysis statistics is also supported by the MANTICORE trial assumptions<sup>14</sup>, where considering an anticipated 11% change in EDVI within-group, a two-tailed significance level of  $\alpha = .05$ , and 80% power required 47 patients per group. To compare the individual characteristics of patients allocated in the distinct groups at T0 (baseline), Chi-squared test or Fisher exact test for categorical variables and ANOVA and REGW-Q for continuous variables are used. Primary endpoint was evaluation of reduction in both systolic and diastolic, early and late subclinical cardiotoxicities measured with standard cardiac echo-color Doppler, 3D echocardiography and LV GLS in pharmacologically treated patients as compared to the placebo group. All references to GLS changes actually consider the absolute value of the number<sup>15</sup>. For each continuous efficacy endpoint, we analyzed the subgroups by repeated measure linear mixed model and for each subgroup by ANOVA and t test with Bonferroni correction. We also performed analysis by ANCOVA, covariates were compared by least significant difference vs. no drug (ramipril or bisoprolol). We fitted a linear mixed model to all available measurements from three time points: (i) baseline, (ii) EOT either after completion of the final cycle of anthracycline therapy and the completion of trastuzumab, and (iii) the completion of 2 years' study (EOS). To investigate possible interactions between the two treatments, we fitted additional models that included a ramipril-per-bisoprolol interaction term and applied a likelihood ratio test to the models with and without the treatment interaction term. No statistically significant treatment interactions were observed. The treatment effects were estimated for patients in four groups: (i) treated with ramipril, (ii) not treated with ramipril, (iii) treated with bisoprolol, and (iv) not treated with bisoprolol using both the between-group difference in change from baseline to EOT and EOS for the comparisons of ramipril vs. no ramipril treatment and bisoprolol vs. no bisoprolol treatment by general linear model with repeated measures and Greenhouse-Geisser correction of within-subject effects and by ANCOVA. The analysis was based on intention to treat (ITT) population. Statistical analyses were performed using IBM SPSS version 26.0 (Armonk, NY: IBM Corp).

### Supplement References

1. Lang RM, Badano LP, Mor-Avi V, et al. Recommendations for cardiac chamber quantification by echocardiography in adults: an update from the American Society of Echocardiography and the European Association of Cardiovascular Imaging. *Eur Heart J Cardiovasc Imaging*. 2015;16(3):233-270.
2. Devereux RB, Alonso DR, Lutas EM, et al. Echocardiographic assessment of left ventricular hypertrophy: comparison to necropsy findings. *Am J Cardiol*. 1986;57(6):450-458.
3. Du Bois D, Du Bois EF. A formula to estimate the approximate surface area if height and weight be known. 1916. *Nutrition*. 1989;5(5):303-311; discussion 312-303.
4. Nagueh SF, Appleton CP, Gillebert TC, et al. Recommendations for the evaluation of left ventricular diastolic function by echocardiography. *J Am Soc Echocardiogr*. 2009;22(2):107-133.
5. Lang RM, Badano LP, Tsang W, et al. EAE/ASE recommendations for image acquisition and display using three-dimensional echocardiography. *J Am Soc Echocardiogr*. 2012;25(1):3-46.
6. Zeng JH, Liu YX, Yuan J, et al. First case of COVID-19 complicated with fulminant myocarditis: a case report and insights. *Infection*. 2020.

7. Inciardi RM, Lupi L, Zaccone G, et al. Cardiac Involvement in a Patient With Coronavirus Disease 2019 (COVID-19). *JAMA Cardiol.* 2020.
8. Kim IC, Kim JY, Kim HA, Han S. COVID-19-related myocarditis in a 21-year-old female patient. *Eur Heart J.* 2020;41(19):1859.
9. Bu'Lock FA, Mott MG, Oakhill A, Martin RP. Left ventricular diastolic function after anthracycline chemotherapy in childhood: relation with systolic function, symptoms, and pathophysiology. *Br Heart J.* 1995;73(4):340-350.
10. Lipshultz SE, Colan SD, Gelber RD, Perez-Atayde AR, Sallan SE, Sanders SP. Late cardiac effects of doxorubicin therapy for acute lymphoblastic leukemia in childhood. *N Engl J Med.* 1991;324(12):808-815.
11. Nagy AC, Tolnay E, Nagykalnai T, Forster T. Cardiotoxicity of anthracycline in young breast cancer female patients: the possibility of detection of early cardiotoxicity by TDI. *Neoplasma.* 2006;53(6):511-517.
12. Steinherz LJ, Steinherz PG, Tan CT, Heller G, Murphy ML. Cardiac toxicity 4 to 20 years after completing anthracycline therapy. *JAMA.* 1991;266(12):1672-1677.
13. Uematsu M, Nakatani S, Yamagishi M, Matsuda H, Miyatake K. Usefulness of myocardial velocity gradient derived from two-dimensional tissue Doppler imaging as an indicator of regional myocardial contraction independent of translational motion assessed in atrial septal defect. *Am J Cardiol.* 1997;79(2):237-241.
14. Pituskin E, Mackey JR, Koshman S, et al. Multidisciplinary Approach to Novel Therapies in Cardio-Oncology Research (MANTICORE 101-Breast): A Randomized Trial for the Prevention of Trastuzumab-Associated Cardiotoxicity. *J Clin Oncol.* 2017;35(8):870-877.
15. Voigt JU, Pedrizzetti G, Lysyansky P, et al. Definitions for a common standard for 2D speckle tracking echocardiography: consensus document of the EACVI/ASE/Industry Task Force to standardize deformation imaging. *J Am Soc Echocardiogr.* 2015;28(2):183-193.
